# Supplementary material
Source: PubMed Central journal article supplement (PMC2736442)
Supplement: 0903805106_0903805106SI.pdf [file 0903805106_0903805106SI.pdf]

# Supporting Information

Czajkowsky and Shao 10.1073/pnas.0903805106

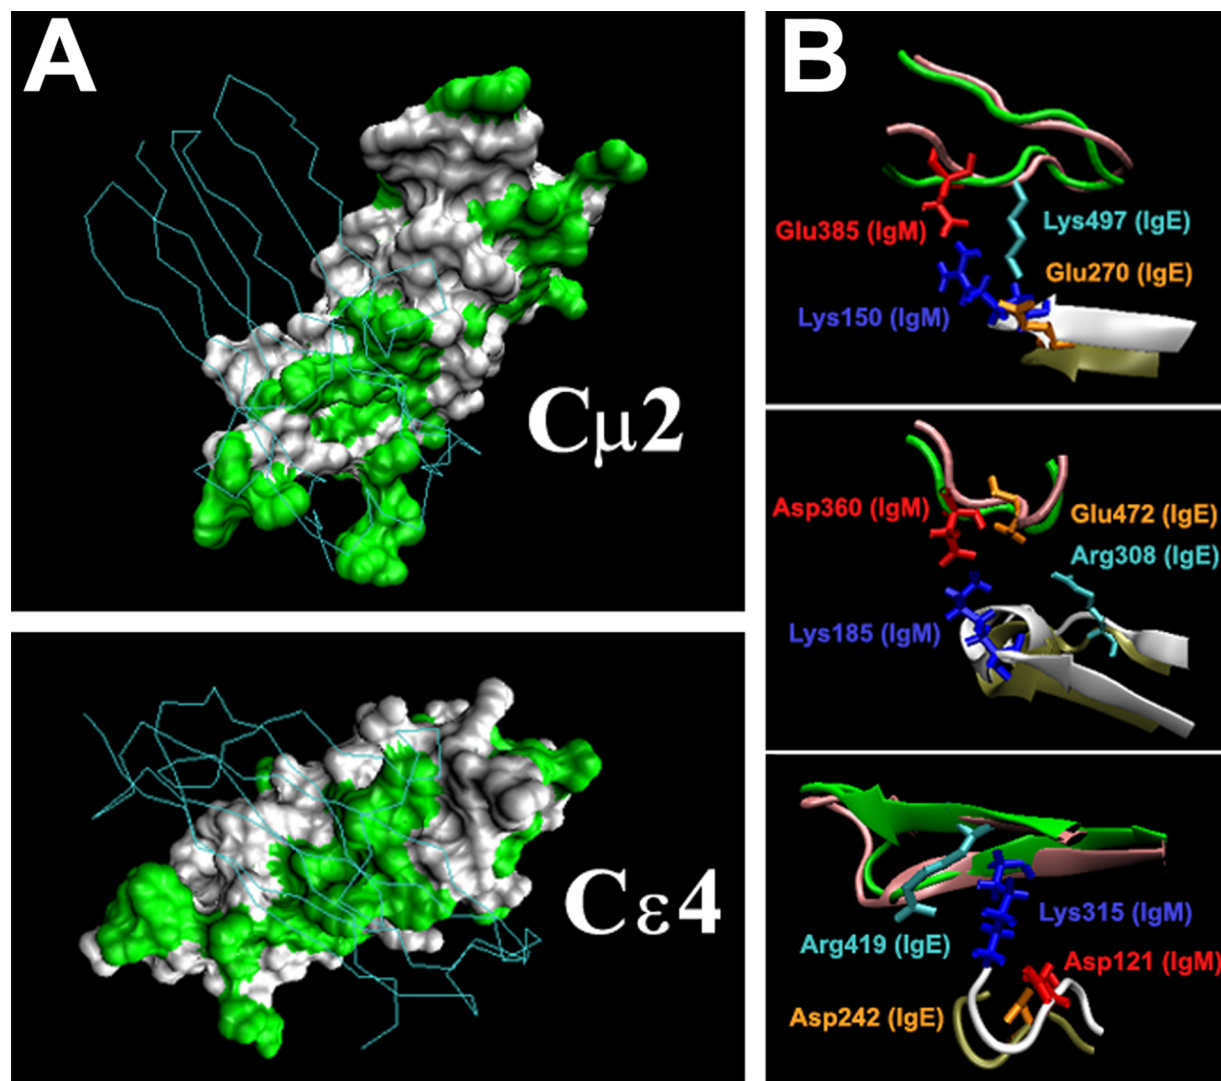

**Fig. S1.** Unexpected similarities in the domain associations in this  $Fc\mu$  structure and those observed previously in other interacting Ig domains. (A) The  $C\mu 2$ - $C\mu 2$  interface is predominantly non-polar, as is the case with most Ig domain pairs (1), such as the  $C\epsilon 4$ - $C\epsilon 4$  pair shown. It is somewhat unexpected here since the  $C\epsilon 2$ - $C\epsilon 2$  interface is predominantly polar, and so the non-polar character in this structure is not a trivial consequence of the equivalence of the corresponding residues. In each figure, the  $C\alpha$  backbone of one domain is shown as a blue trace and the surface of the other domain is shown with polar residues colored white, hydrophobic residues colored green, and the cysteine residues colored yellow. (B) Two of the four salt bridges found in the  $C\mu 2$ - $C\mu 3,4$  interface link together similar local regions as those in the  $C\epsilon 2$ - $C\epsilon 3,4$  interface, although none involve conserved residues. A third salt bridge in the  $C\mu 2$ - $C\mu 3,4$  interface (in the *Bottom*) may also have a correlate to one in the  $C\epsilon 2$ - $C\epsilon 3,4$  interface, although this salt bridge was not mentioned in the previous work (1). The two IgE heavy chains are colored pink and tan, and the two IgM heavy chains are colored green and white.

1. Wan T, et al. (2002) The crystal structure of IgE Fc reveals an asymmetrically bent conformation. *Nat Immunol* 3:681–686.

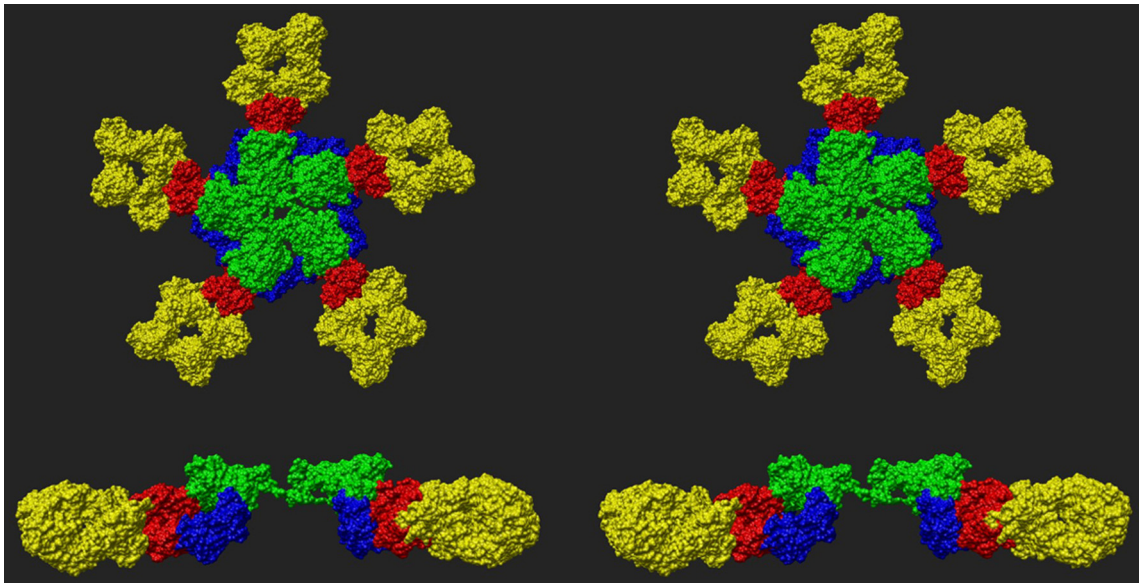

**Fig. S2.** Stereoview representation of the surface of the IgM pentamer model. In the *Lower*, only two monomers are shown for clarity. The domains of the Fc region are colored as in Fig. 1, and the Fab domains are colored yellow.



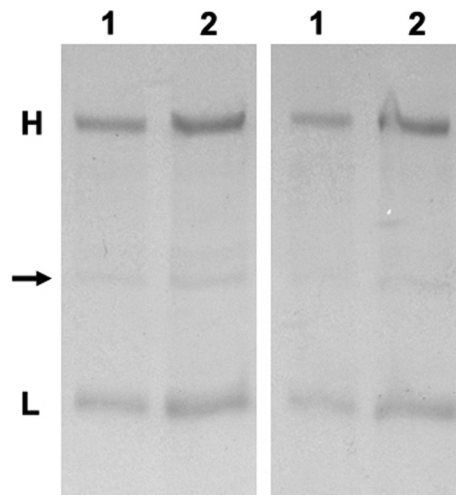

**Fig. S4.** Confirmation of the quality of the sample by SDS/PAGE in a reducing 4%–20% gradient gel. Labels H and L refer to the bands of the heavy and light chains of IgM, respectively, and the arrow points to a minor band determined to be <10% of the heavy chain band. In duplicate, 0.5  $\mu$ g and 1  $\mu$ g of the stock IgM solution were added to lanes 1 and 2, respectively.
